# Supplementary material for: Computational Modeling of the Interactions between DPP IV and Hemorphins
Source: MDPI journal article supplement (doi:10.3390/ijms25053059), 2024-03-06
Supplement: s1 [file s1]

# Computational modeling of the interactions between DPP IV and hemorphins

Priya Antony<sup>1</sup>, Bincy Baby<sup>1</sup>, Amie Jobe<sup>1</sup> and Ranjit Vijayan<sup>1,2,3,\*</sup>

<sup>1</sup> Department of Biology, College of Science, United Arab Emirates University, PO Box 15551, Al Ain, United Arab Emirates

<sup>2</sup> The Big Data Analytics Center, United Arab Emirates University, PO Box 15551, Al Ain, United Arab Emirates.

<sup>3</sup> Zayed Center for Health Sciences, United Arab Emirates University, PO Box 15551, Al Ain, United Arab Emirates.

\* Corresponding authors: ranjit.v@uaeu.ac.ae (R.V.)

## Supplementary Materials

**Table S1:** List of peptides used in this study

| #  | Peptides                  | <u>Amino acids</u>                      |
|----|---------------------------|-----------------------------------------|
| 1  | YPWTQRF (H7)              | Tyr-Pro-Trp-Thr-Gln-Arg-Phe             |
| 2  | YPWTQR (H6)               | Tyr-Pro-Trp-Thr-Gln-Arg                 |
| 3  | YPWTQ (H5)                | Tyr-Pro-Trp-Thr-Gln                     |
| 4  | YPWT (H4)                 | Tyr-Pro-Trp-Thr                         |
| 5  | VVYPWTQR (VVH6)           | Val-Val-Tyr-Pro-Trp-Thr-Gln-Arg         |
| 6  | VVYPWTQRF (VVH7)          | Val-Val-Tyr-Pro-Trp-Thr-Gln-Arg-Phe     |
| 7  | LVVYPWT (LVV H4)          | Leu-Val-Val-Tyr-Pro-Trp-Thr             |
| 8  | LVVYPWTQ (LVV H5)         | Leu-Val-Val-Tyr-Pro-Trp-Thr-Gln         |
| 9  | LVVYPWTQR (LVV H6)        | Leu-Val-Val-Tyr-Pro-Trp-Thr-Gln-Arg     |
| 10 | LVVYPWTQRF (LVV H7)       | Leu-Val-Val-Tyr-Pro-Trp-Thr-Gln-Arg-Phe |
| 11 | YPWTRRF (Camel H7)        | Tyr-Pro-Trp-Thr-Arg-Arg-Phe             |
| 12 | YPWTRR (Camel H6)         | Tyr-Pro-Trp-Thr-Arg-Arg                 |
| 13 | YPWTR (Camel H5)          | Tyr-Pro-Trp-Thr-Arg                     |
| 14 | VVYPWTRR (Camel VVH6)     | Val-Val-Tyr-Pro-Trp-Thr-Arg-Arg         |
| 15 | VVYPWTRRF (Camel VVH7)    | Val-Val-Tyr-Pro-Trp-Thr-Arg-Arg-Phe     |
| 16 | LVVYPWTR (Camel LVV H5)   | Leu-Val-Val-Tyr-Pro-Trp-Thr-Arg         |
| 17 | LVVYPWTRR (Camel LVV H6)  | Leu-Val-Val-Tyr-Pro-Trp-Thr-Arg-Arg     |
| 18 | LVVYPWTRRF (Camel LVV H7) | Leu-Val-Val-Tyr-Pro-Trp-Thr-Arg-Arg-Phe |

**Table S2:** GlideScore (GScore) and binding energy values of VV and LVV hemorphins

| <b>Peptides</b>           | <b>GScore<br/>binding<br/>score<br/>(kcal/mol)</b> | <b>MM-GBSA<br/>binding free<br/>energy<br/>(kcal/mol)</b> |
|---------------------------|----------------------------------------------------|-----------------------------------------------------------|
| VVYPWTQR (VVH6)           | -7.82                                              | -92.89                                                    |
| VVYPWTQRF (VVH7)          | -8.49                                              | -91.34                                                    |
| LVVYPWT (LVV H4)          | -8.31                                              | -87.75                                                    |
| LVVYPWTQ (LVV H5)         | -9.94                                              | -91.11                                                    |
| LVVYPWTQR (LVV H6)        | -9.24                                              | -94.30                                                    |
| LVVYPWTQRF (LVV H7)       | -10.60                                             | -93.14                                                    |
| VVYPWTRR (Camel VVH6)     | -9.93                                              | -95.66                                                    |
| VVYPWTRRF (Camel VVH7)    | -9.76                                              | -92.56                                                    |
| LVVYPWTR (Camel LVV H5)   | -9.87                                              | -98.47                                                    |
| LVVYPWTRR (Camel LVV H6)  | -9.62                                              | -95.11                                                    |
| LVVYPWTRRF (Camel LVV H7) | -10.39                                             | -92.35                                                    |

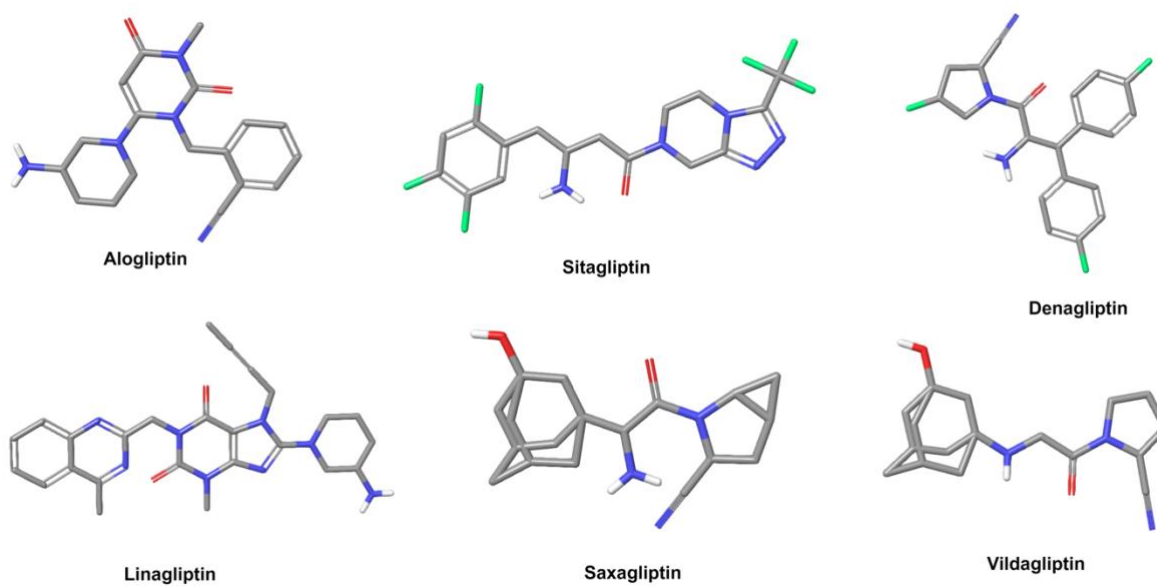

**Figure S1:** Chemical structures of DPP IV inhibitors.

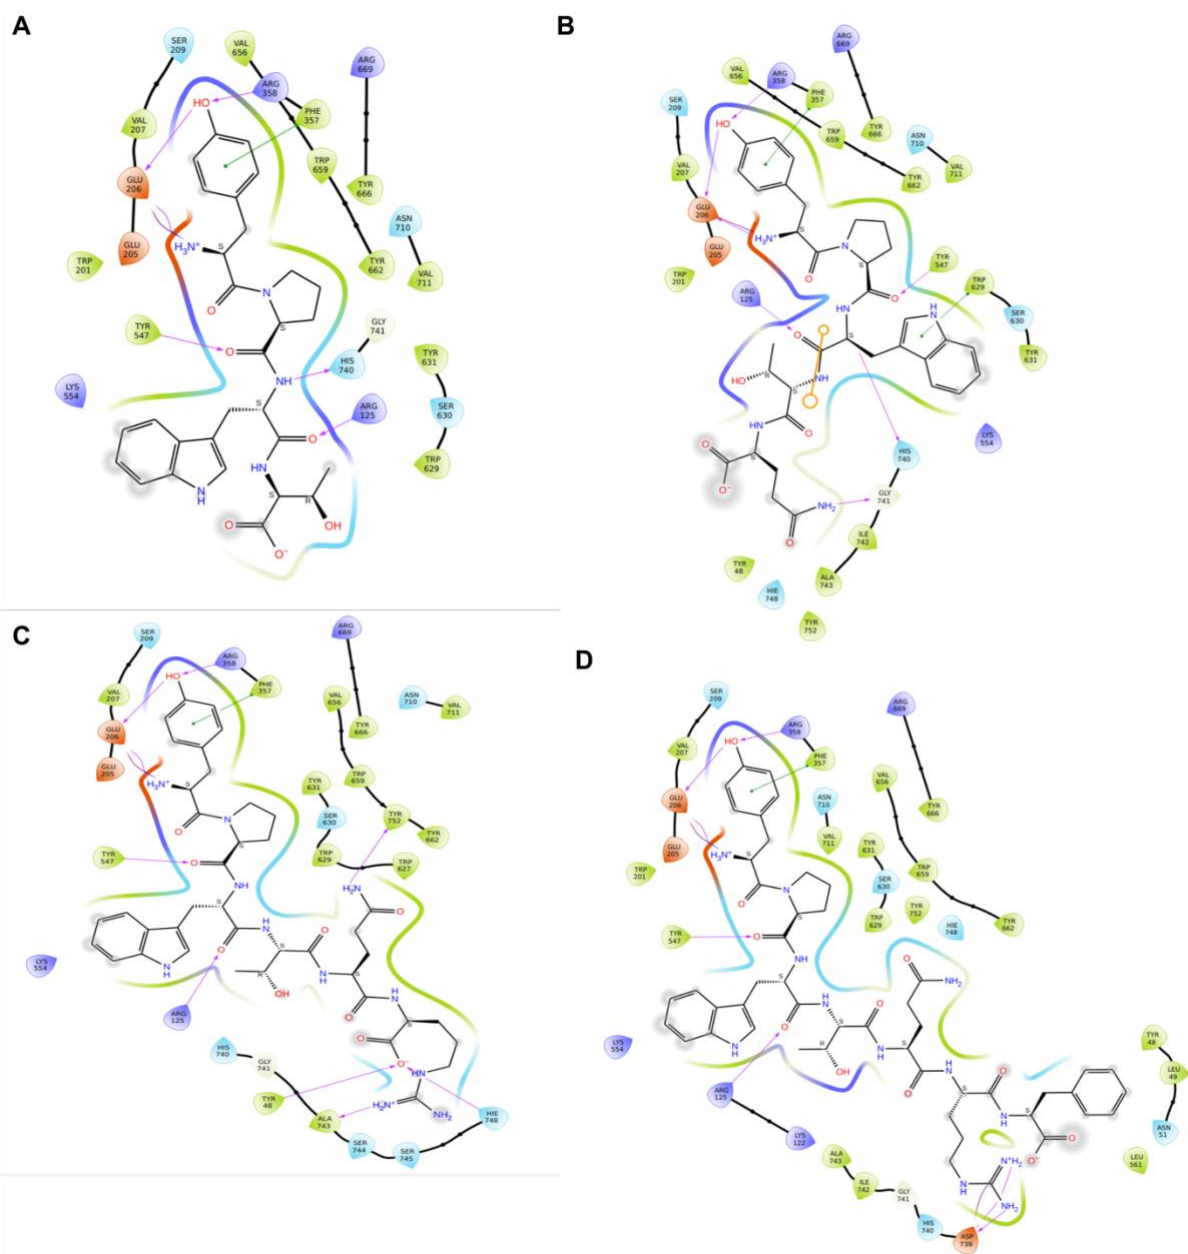

**Figure S2:** Ligand interaction diagram of hemorphins (A) H4 (B) H5 (C) H6 (D) H7.

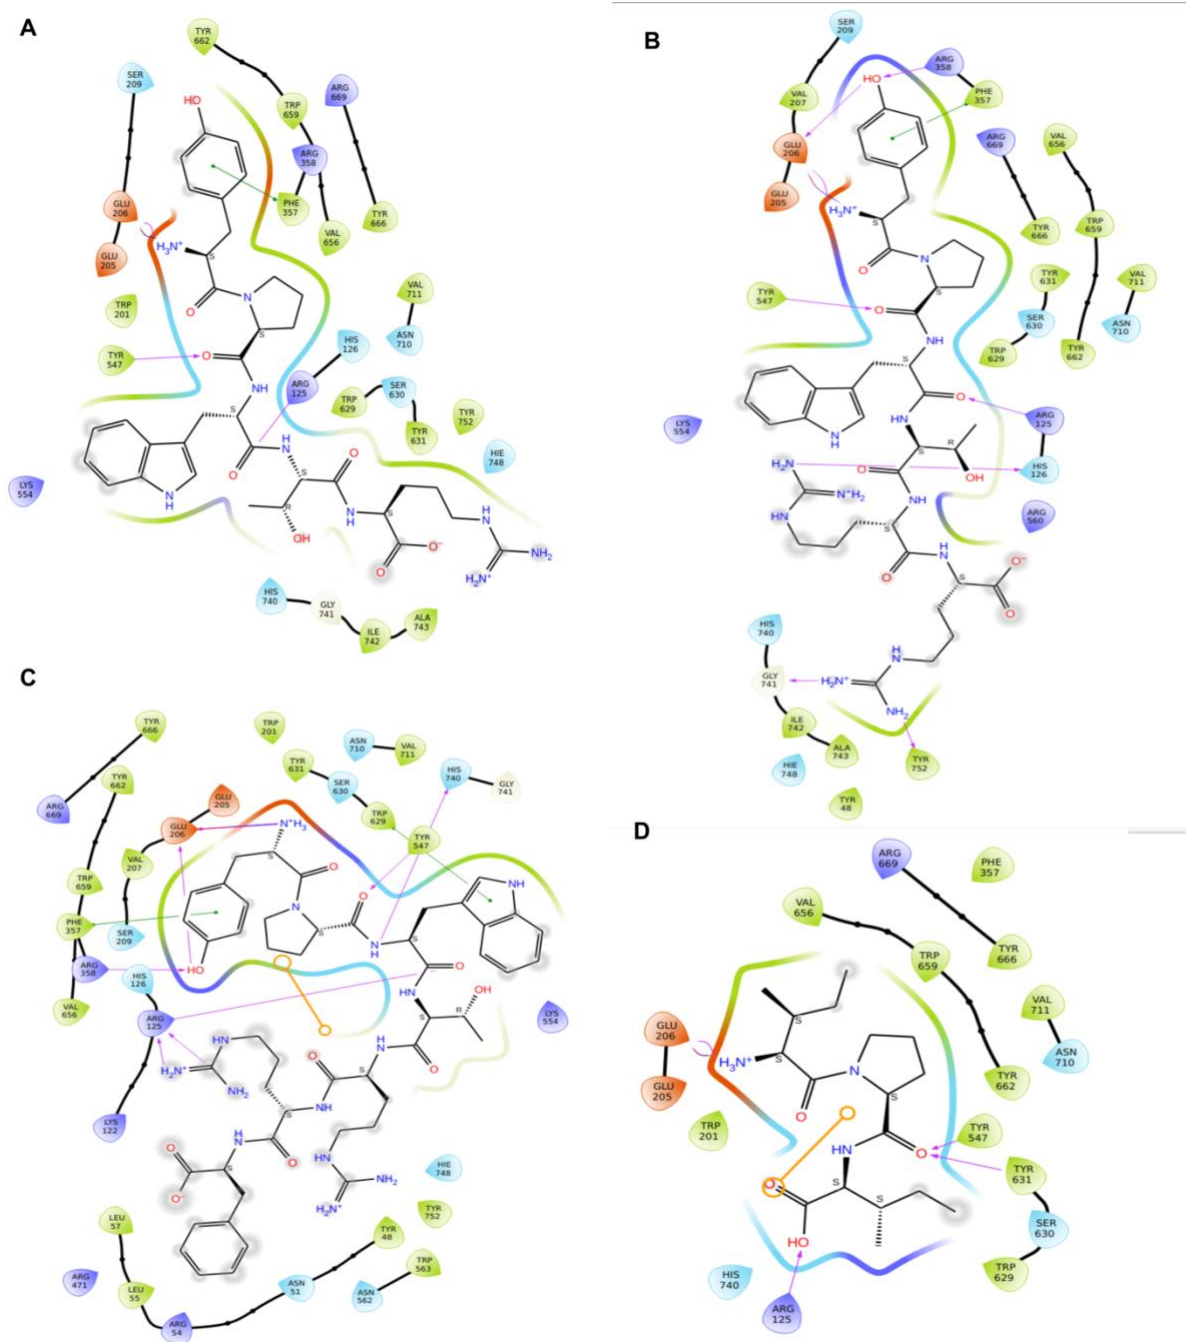

**Figure S3:** Ligand interaction diagram of camel hemorphins and control (A) Camel H5, (B) Camel H6, (C) Camel H7, (D) Diprotin A

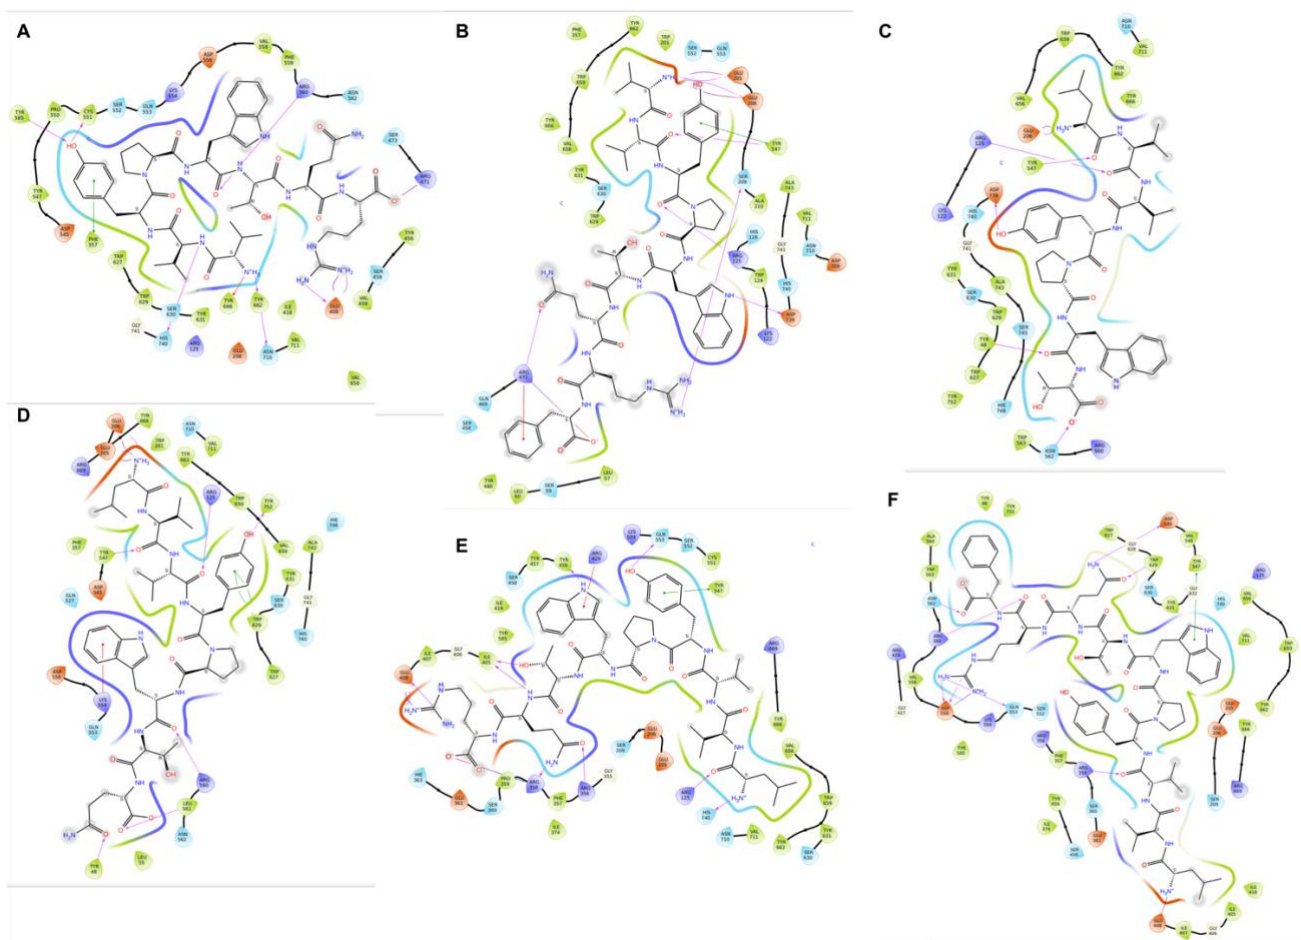

**Figure S4:** Ligand interaction diagram of hemorphins (A) VVH6 (B) VVH7 (C) LVVH4 (D) LVVH5 (E) LVVH6 (F) LVVH7

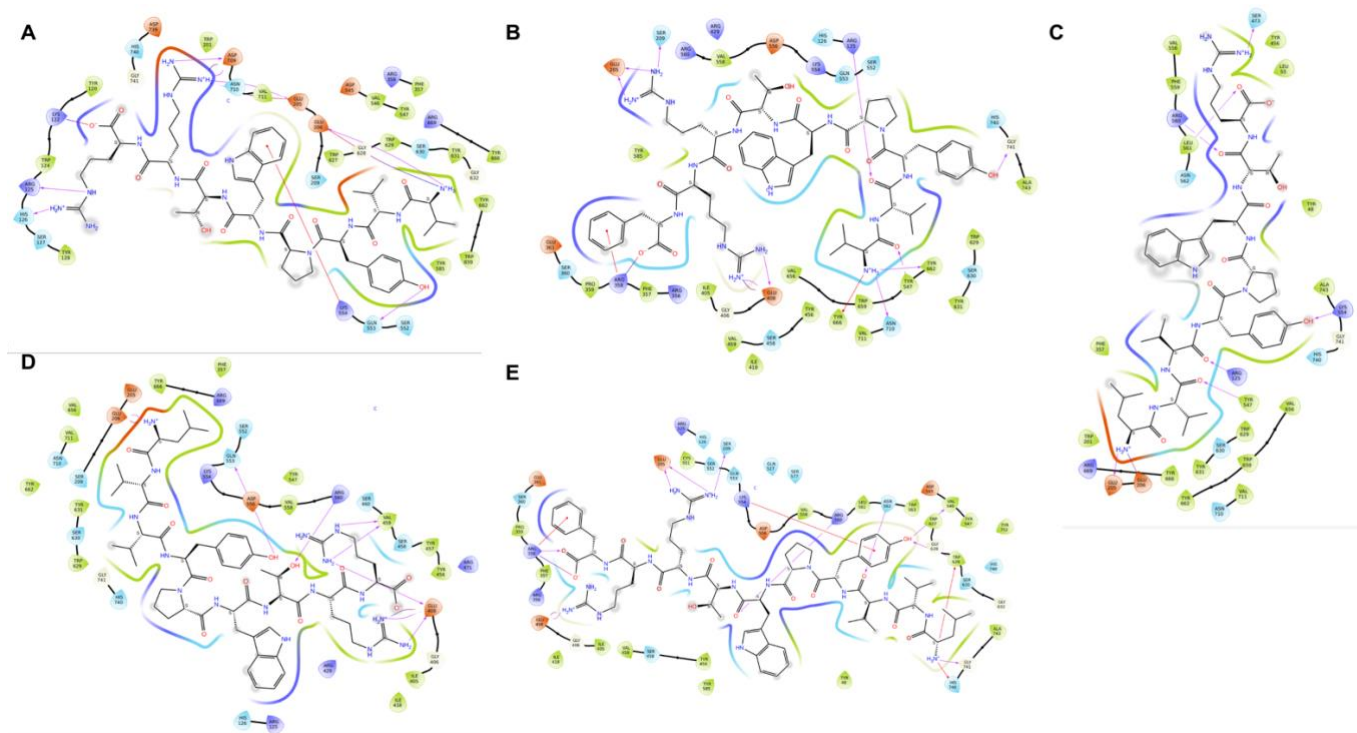

**Figure S5:** Ligand interaction diagram of camel hemorphins (A) Camel VVH6 (B) Camel VVH7 (C) Camel LVVH5 (D) Camel LVVH6 (E) Camel LVVH7



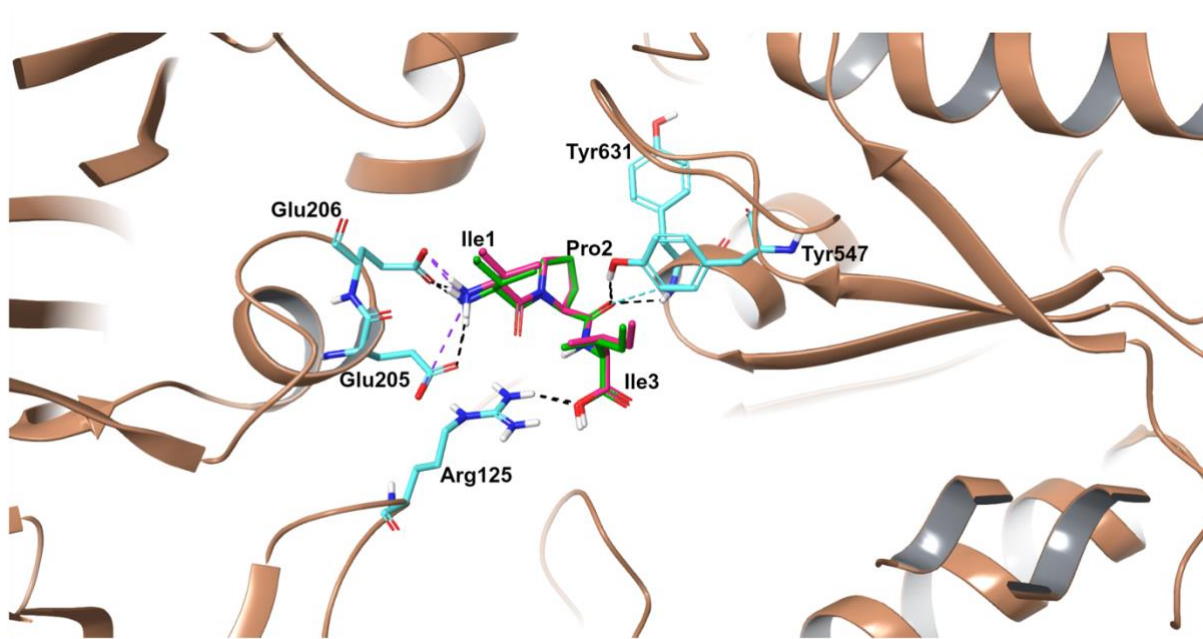

**Figure S6:** Superimposed structure of positive control Diprotin A in docked conformation (pink colour) and experimental position (green colour).

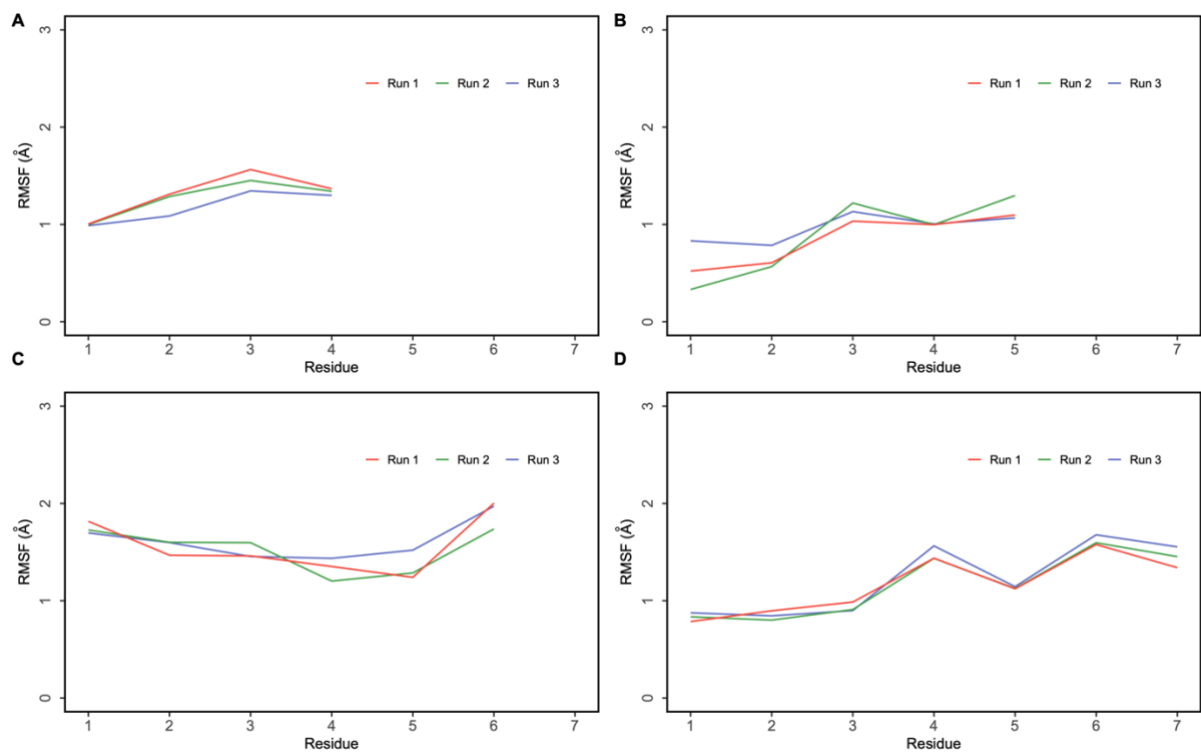

**Figure S7:** Root Mean Square Fluctuation (RMSF) of bound peptide C $\alpha$  atoms after aligning the protein structure in each frame of the simulation. Non-camel hemorphins (A) H4, (B) H5, (C) H6, (D) H7.

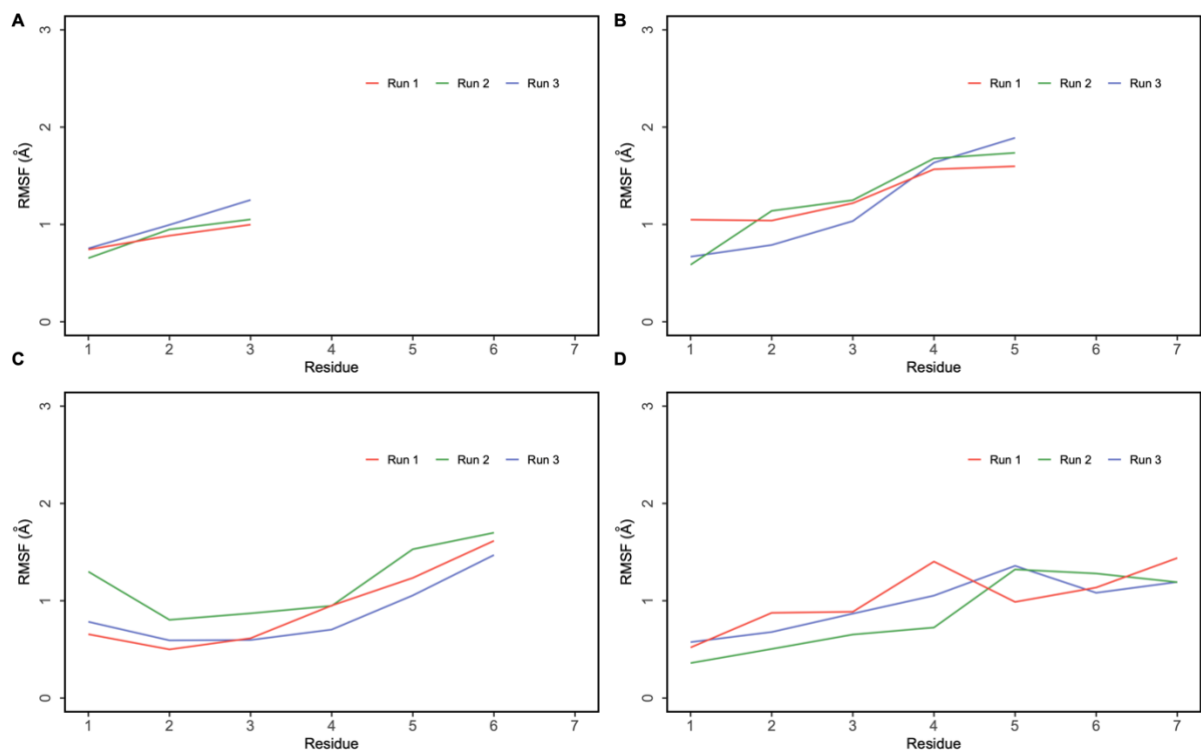

**Figure S8:** Root Mean Square Fluctuation (RMSF) of bound peptide C $\alpha$  atoms after aligning the protein structure in each frame of the simulation. (A) Diprotin A, (B) Camel H5, (C) Camel H6, (D) Camel H7.
